# Supplementary material for: Understanding the delayed prescribing of antibiotics for respiratory tract infection in primary care: a qualitative analysis
Source: PubMed Central journal article supplement (PMC5129131; doi:10.1136/bmjopen-2016-011882), 2016-11-18
Supplement: bmjopen-2016-011882supp.pdf [file bmjopen-2016-011882supp.pdf]

## Supplement 1: Interview Topic Guide

### SECTION 1

- a. Please describe your understanding of antibiotic prescribing for RTIs?
- b. What key factors have influenced you to practice in this way?
- c. How has your practice changed over time?
- d. Can you please describe about your practice's policy about antibiotic prescribing and RTI?
- e. How do you decide when a patient requires (or doesn't require) antibiotics for RTIs?
- f. Can you tell me about the side effects of prescribing antibiotics for RTI?

### SECTION 2

- a. Please describe your understanding of "delayed antibiotic prescribing" as an approach to treating RTIs?
- b. Why do you think delayed antibiotic prescribing is used as a way to treat RTIs?

### SECTION 3

- a. Please describe whether you use/don't use any form of delayed antibiotic prescribing in your practice?
- b. What information do you tend to give to patients when they come to you with an RTI?
- c. If you are delaying the prescription, under what circumstances do you advise patients to collect it?
- d. How do patients respond to delayed antibiotic prescribing?
- e. How do you reassure patients if you are delaying a prescription?
- f. Please describe whether you provide patients with any information or advice for alternative ways of managing their RTI symptoms?
- g. If you don't use delayed prescribing, could you tell me why this is?
- h. How do other colleagues in the practice respond to delayed antibiotic prescribing?

### SECTION 4

- a. Please describe any facilitators of delayed antibiotic prescribing?
- b. Please describe any barriers of delayed antibiotic prescribing?

### SECTION 5

- a. Do you think training should be given to GPs to assist them in using delayed antibiotic prescribing?
- b. What type of training should be given to GPs?
- c. How do you think this training should be delivered?
- d. Who do you think should deliver this training?

### SECTION 6

- a. Is there anything else about delayed antibiotic prescribing that we haven't discussed that you think would be useful for me to know about?

**NB – additional prompts were used when needed.**
